# Supplementary material for: Genomic data for 78 chickens from 14 populations
Source: PubMed Central journal article supplement (PMC5449643; doi:10.1093/gigascience/gix026), 2017-04-18

## Genomic data for 78 chickens from 14 populations

Diyang Li<sup>1†</sup>, Tiandong Che<sup>1†</sup>, Binlong Chen<sup>1†</sup>, Shilin Tian<sup>1,2†</sup>, Xuming Zhou<sup>3†</sup>, Guolong Zhang<sup>4†</sup>, Miao Li<sup>1</sup>, Uma Gaur<sup>1</sup>, Yan Li<sup>1</sup>, Majing Luo<sup>5</sup>, Long Zhang<sup>1</sup>, Zhongxian Xu<sup>1</sup>, Xiaoling Zhao<sup>1</sup>, Huadong Yin<sup>1</sup>, Yan Wang<sup>1</sup>, Long Jin<sup>1</sup>, Qianzi Tang<sup>1</sup>, Huailiang Xu<sup>1</sup>, Mingyao Yang<sup>1</sup>, Rongjia Zhou<sup>5</sup>, Ruiqiang Li<sup>2</sup>, Qing Zhu<sup>1</sup> and Mingzhou Li<sup>1</sup>

<sup>1</sup> Institute of Animal Genetics and Breeding, College of Animal Science and Technology, Sichuan Agricultural University, Chengdu, China

<sup>2</sup> Novogene Bioinformatics Institute, Beijing, China

<sup>3</sup> Division of Genetics, Department of Medicine, Brigham and Women's Hospital, Harvard Medical School, Boston, USA

<sup>4</sup> Department of Animal Science, Oklahoma State University, Stillwater, Oklahoma, USA

<sup>5</sup> Hubei Key Laboratory of Cell Homeostasis, Laboratory of Molecular and Developmental Genetics, College of Life Sciences, Wuhan University, Wuhan, China

<sup>†</sup> These authors contributed equally to this work.

**Correspondence:** [zhuqingsicau@163.com](mailto:zhuqingsicau@163.com); [mingzhou.li@sicau.edu.cn](mailto:mingzhou.li@sicau.edu.cn).

### Abstract

**Background:** Since the domestication of the red jungle fowls (*Gallus gallus*) (dating back to ~10,000 B.P.) in Asia, domestic chickens (*Gallus gallus domesticus*) have been subjected to the combined effects of natural selection and human-driven artificial selection; this has resulted in marked phenotypic diversity in a number of traits, including behavior, body composition, egg production and skin color. Population genomic variations through diversifying selection have not been fully investigated.

**Findings:** The whole genomes of 78 domestic chickens were sequenced to an average of 18-fold coverage for each bird. By combining this data with publicly available genomes of 5 wild red jungle fowls and 8 Xishuangbanna game fowls, we conducted a comprehensive comparative genomics analysis of 91 chickens from 17 populations. After aligning ~21.30 gigabases (Gb) of high quality data from each individual to the reference chicken genome, we identified ~6.44 million (M) SNPs for each population. These SNPs included 1.10 M novel SNPs in 17 populations that were absent in the current chicken dbSNP (Build 145) entries.

**Conclusions:** The current data is important for population genetics and further studies in chicken, and will serve as a valuable resource for investigating diversifying selection and candidate genes for selective breeding in chicken.

**Keywords:** Chicken, Genetic diversity, Population genomics, Whole-genome resequencing

### Data description

#### Genome sequencing and sequence filtering

The 78 blood samples (36 Tibetan fowls from the Qinghai-Tibet Plateau and 42 domestic fowls from Szechwan Basin) (Figure 1) were collected from the wing vein. The animal handling experiments were approved by the Institutional Animal Care and Use Committee of Sichuan Agricultural University under permit number YCS-B20100804. Genomic DNA was extracted from these samples following standard procedures. In total, we generated ~1.69 trillion bases of resequencing data of the whole genomes from 78 birds (18.03-fold coverage for each

---

individual) on the Illumina Hiseq 2500 platform (Additional file 1:Table S1). In addition, previously published genome sequence data from 5 red jungle fowls (RJF) and 8 Xishuangbanna game fowls (~16.6-fold coverage for each individual) were downloaded and analyzed (GenBank accession number PRJNA241474) (Figure 1).

We also filtered out the adapter sequences (> 10 nt aligned to the adapter, allowing ≤ 10% mismatches), low quality reads (i.e. ≥ 10% unidentified nucleotides or > 50% bases having Phred quality < 5) and duplicated reads generated in the library construction process.

## Data analysis

### Reads mapping

The high quality paired-end reads were mapped to the reference chicken genome (Galgal4.78) using Burrows-Wheeler Aligner (BWA) software (version 0.7.8) [1] with the command ‘mem -t 10 -k 32’ and BAM alignment files were generated using SAMtools (version 0.1.19) [2].

Next, we improved the alignment results by the following steps:

(1) The aligned reads with mismatches ≥ 5 or mapping quality = 0 were removed;

(2) The alignment results were then corrected using Picard (version 1.96) (<http://broadinstitute.github.io/picard/>) with two core commands. The ‘AddOrReplaceReadGroups’ command was used to replace all read groups in the INPUT file with a new read group and assign all reads to this group in the OUTPUT BAM. The ‘FixMateInformation’ command was used to ensure that all mate-pair information was in sync between each read and its mate pair;

(3) Removed potential PCR duplications. If multiple read pairs had identical external coordinates, only the pair with the highest mapping quality was retained;

(4) Realigned reads around the Insertions and deletions (InDels). We downloaded variants registered in chicken dbSNP database (Build 145) from NCBI, and generated a target list of intervals by using the command “RealignerTargetCreator” in package Genome Analysis Toolkit (GATK, version 3.1-1- g07a4bf8) [3]. We further used the command “IndelRealigner” to identify regions for realignment where at least one read contains a registered InDel with a cluster of mismatching bases around it.

Consequently, ~21.30 Gb high quality data of each individual mapping to reference chicken genome (Additional file 1: Table S1) were used for subsequent analysis.

### SNP calling

We first detected individual SNPs simultaneously confirmed by both SAMtools and GATK. The highly accurate alignment was processed using the ‘mpileup’ program in SAMtools with the parameters ‘-C 50 -D -S -m 2 -F 0.002 -d 1000’ (‘-C 50’ is a recommended parameter, ‘-D’ and ‘-S’ are default parameters, ‘-m 2’, ‘-F 0.002’ and ‘-d 1000’ are required parameters). The variants were then filtered for downstream analysis by requiring a coverage

---

84 ranging from 4 to 200, a minimum root-mean-square mapping quality of 20 and no gaps present  
85 within a 3-bp window. Meanwhile, we detected genomic variants for each bird using GATK  
86 with the HaplotypeCaller-based method; before calling variants, the base quality scores were  
87 recalibrated using command “BaseRecalibrator”, which provides empirically accurate base  
88 quality scores for each base in every read. After SNP calling, we applied hard filter command  
89 ‘VariantFiltration’ to exclude potential false-positive variant calls with the parameter ‘--  
90 filterExpression "QD < 10.0 || FS > 60.0 || MQ < 40.0 || ReadPosRankSum < -8.0" -G\_filter  
91 "GQ<20"’. As a result, ~6.44 Mb SNPs for each breed/population were identified (Additional  
92 file 1: Table S2).

93 Then we merged all individual SNPs into a population SNP-matrix. Finally, we obtained  
94 8.53 Mb highly credible SNPs after using strict criteria with filtering MAF (minor allele  
95 frequency) < 0.05 and missing genotype > 10% in chicken population. Subsequently, the  
96 package ANNOVAR (version May 20, 2013) [4] was used to annotate SNPs causing nonsense  
97 and missense mutations.

### 98 99 *Insertions and deletions (InDels) calling*

100 The candidate InDels were called along with SNPs by GATK for 91 individuals. We first  
101 sifted structural variations for each sample by GATK with the SelectVariants based method.  
102 Then, we applied hard filter command ‘VariantFiltration’ to exclude potential false-positive  
103 variant calls with the parameter ‘--filterExpression "QD < 2.0 || FS > 200.0 || ReadPosRankSum  
104 < -8.0 || InbreedingCoeff < -0.8"’. Finally, we only retained the 1-30 bp InDels for downstream  
105 analysis.

### 106 107 *Analysis of the population structure and evolutionary history*

108 Rooted neighbor-joining phylogenetic tree was constructed under the p-distances model in  
109 TreeBeST (version 1.9.2) (<http://treesoft.sourceforge.net/treebest.shtml>), using Japanese quail  
110 as an outgroup. The reliability of each branch was evaluated by bootstrapping [5] with 1,000  
111 replicates. The phylogenetic relationships of the individual genomes were also estimated using  
112 principle component analysis (PCA) with the population-scale SNPs using the EIGENSOFT  
113 (version 5.0) [6] software, and the eigenvectors were obtained from the covariance matrix  
114 generated by R function reigen.

## 115 116 **Findings**

### 117 *Genetic diversity*

118 A total of 7.43 Mb of SNPs out of 8.53 Mb highly credible SNPs were already present in  
119 chicken dbSNP database (known SNPs) and 1.10 Mb SNPs were assigned as novel ones. All  
120 1.10 Mb novel SNPs have been submitted to dbSNP (accession numbers from ss2585830405  
121 to ss2586846514 and ss2137077162; see Additional file 2). We further conducted a  
122 comparative genomics analysis of 91 chickens from 15 domestic and 2 wild populations (Figure  
123 1). The general phenotypic differences between red jungle fowls (RJF), Tibetan fowls and

124 Sichuan local fowls are shown in Additional file 1: Table S3. We identified 3.46-7.52 Mb SNPs  
 125 for each breed/population that were confirmed by both SAMtools and GATK softwares  
 126 (Additional file 1: Table S2). There were 1,398 to 7,977 SNPs specifically detected in a  
 127 breed/population (Figure 1). Nucleotide variability ( $\theta\pi$ ) and polymorphism ( $\theta\omega$ ) in each  
 128 population were analyzed using the method of sequence diversity statistics. Compared with  
 129 Sichuan local chicken breeds ( $\theta\pi = 2.35 \times 10^{-3}$  and  $\theta\omega = 2.13 \times 10^{-3}$ ), Tibetan chicken populations  
 130 have relatively higher genetic diversity ( $\theta\pi = 2.58 \times 10^{-3}$ ,  $P < 2.2 \times 10^{-16}$  and  $\theta\omega = 2.35 \times 10^{-3}$ ,  $P$   
 131  $= 0.656$ , Mann-Whitney U test) (Additional file 1: Figure S1).

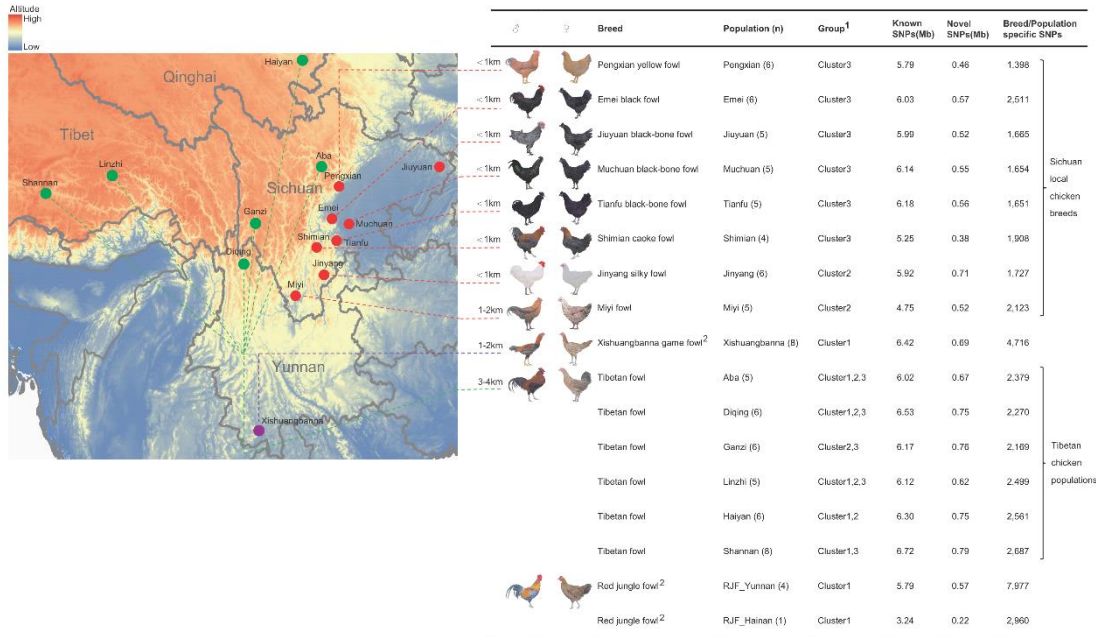

13 **Figure 1.** Sample information and comparison of identified SNPs in each breed/population with  
 133 the chicken variants database (dbSNP, Build 145). Known SNPs are SNPs already in chicken  
 134 dbSNP. The map displayed here is the geographic distribution of domestic chicken populations,  
 135 numbers above the dashed lines are altitudes. Red and green localities represent eight lowland  
 136 and six highland chicken populations respectively, sampled in this study. <sup>1</sup> Individual  
 137 distribution to each group can be found in Additional file 1: Table S1. <sup>2</sup> The whole-genome  
 138 sequencing data of eight game fowls and 5 RJFs were downloaded from the NCBI.  
 139

140  
 141 As shown in Additional file 1: Figure S2, although most novel SNPs (89.02%) had a low  
 142 allele frequency (<0.2 of 91 individuals) compared with the known SNPs (44.02%), only 9,918  
 143 (0.88% of 1.10 M) novel SNPs were specifically detected in one breed/population (at least in  
 144 one individual). These novel SNPs exhibited similar read depth with the known SNPs (median  
 145 of  $20 \times$  versus  $19 \times$ ), which are both comparable with the average depth for the genome (median  
 146 of 1.14-fold versus 1.06-fold) (Additional file 1: Figure S3). In addition, we observed more  
 147 than 75% of the novel SNPs and 86% of the known SNPs were in non-repeat regions. These  
 148 results suggest the novel SNPs will serve as a potentially valuable resource for further chicken  
 149 studies.

150 Overall distribution of the lengths of insertions and deletions (InDels) showed that more  
 151 than 80% of the InDels were 1-5 bp in length (Additional file 1: Figure S4). Repetitive elements  
 152 (10.61% of the genome and containing ~15.70% of InDels) are an important source of structural

variation in chicken genome (Additional file 1: Figure S5). About a half of InDels (48.39% to 51.52%) were occurred in the intergenic regions (588.65 Mb and 56.23% of the genome). The introns (403.35 Mb and containing ~43.86% of InDels) showed higher incidence of InDels than the coding sequences (25.81 Mb and containing ~1.77% of InDels) (Additional file 1: Figure S6). We observed an enrichment of short InDels (1-15 bp in length) in coding sequences that were multiples of 3 bp compared to whole genome sequences, which is expected to preserve the reading frame (Additional file 1: Figure S7).

### Population genetics

The neighbor-joining phylogenetic tree revealed the segregation of 15 domestic populations and 2 wild RJF populations into three distinct clusters (cluster 1, cluster 2 and cluster 3) (Figure 2A). The principal component analysis (PCA) as implemented in EIGENSOFT package [6] recapitulated these findings (Figure 2B) and revealed that the cluster 2 can be further split into two sub-clusters. The Tibetan fowls in cluster 2 are more genetically close to the Jinyang silky fowls (sub-cluster 2-R) than Miyi fowls (sub-cluster 2-L) (Figure 2B). Different from a previous report on the two independent origins of Tibetan chickens [8], we revealed the presence of at least three distinct clusters among the six geographically representative populations of Tibetan fowls: the fowls inhabiting Tibet and Qinghai (in cluster 1) were genetically closer to RJF, while the Tibetan chickens inhabiting Yunnan and Sichuan (clusters 2 and 3) were closer to the domestic populations (Figure 1). These distinct distribution patterns and expansion signatures suggested that the divergent Tibetan clades may have originated from different regions, such as Yunnan, southwest China and/or surrounding areas [8]. We found that many Tibetan chickens clustered with other Sichuan local chicken breeds in cluster 2 and cluster 3, which may be attributable to shared ancestral polymorphism and/or recent introgression events by way of possible crossbreeding between Tibetan chicken with the geographically neighboring Sichuan local chickens. Although this inference is consistent with recent breeding activities in Tibet plateau [8], further analysis are required to explore the introgression between them.

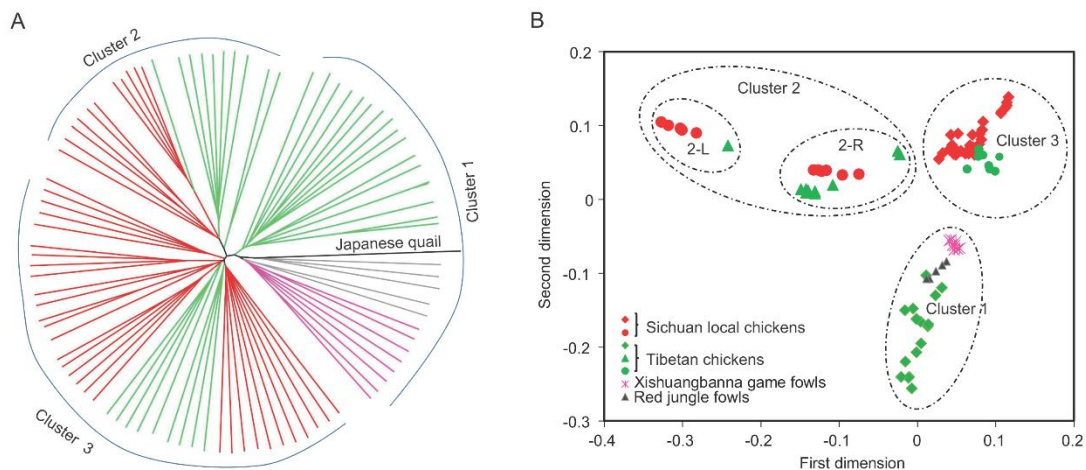

**Figure 2. Population genetics of studied chickens.** (A) Rooted neighbor-joining phylogenetic tree with the Japanese quail as an outgroup. The reliability of each branch was evaluated by bootstrapping with 1,000 replicates. Different groups of chicken populations: Sichuan local chickens (red), Tibetan chickens (green), the Xishuangbanna game fowls (purple), RJFs (grey)

---

186 and Japanese quail (black). (B) Principal component plots. The first dimension and second  
187 dimension are shown. The fraction of the variance explained was 8.91% for eigenvector 1  
188 ( $P<0.05$ , Tracy-Widom test) and 7.43% for eigenvector 2 ( $P<0.05$ , Tracy-Widom test).

## 190 **Conclusion**

191 Understanding the nature of diversifying selection, especially detecting selection  
192 signatures, and identifying genes in a genome that are, or have been, under selection have been  
193 the hot topics of interests. This study provides comparative genomic landscape of variations in  
194 17 chicken populations to understand genetic variations underlying the phenotypic diversity of  
195 chicken breeds/populations. This data will serve as a valuable resource for investigating  
196 diversifying selection and candidate genes for selective breeding in chicken.

## 198 **Availability of supporting data**

199 The sequencing data for this project have been deposited in the NCBI sequence read archive  
200 (SRA) under accession number SRP067615. Additional data, including sequence variations in  
201 Variant Call Format (VCF), are available in the *GigaScience* repository, GigaDB[9]. All  
202 supplementary figures and tables are provided in Additional file 1.

## 204 **Additional file**

205 **Table S1.** A summary of the chickens used in this study: regions of collection/population and  
206 sequencing depths. **Table S2.** SNPs annotation and genetic diversity of 17 chicken populations  
207 analyzed in this study. **Table S3.** The general phenotypic differences between red jungle fowls,  
208 Tibetan and Sichuan local chickens. **Figure S1.** Average nucleotide polymorphism ( $\theta_w$ ) and  
209 nucleotide diversity ( $\theta_\pi$ ) among Sichuan local chickens, Tibetan chickens and red jungle fowls.  
210 **Figure S2.** Allele frequency spectra in 91 birds and Number of alleles distribute in 1 to 17  
211 chicken breeds/populations. **Figure S3.** Comparison of read depth between the known and  
212 novel SNPs.. **Figure S4.** Overall distribution of the lengths of InDels (1-30 bp). **Figure S5.**  
213 Percentage composition of InDels in repeat elements. **Figure S6.** Percentage distribution (A)  
214 and probability (B) for InDels across different genomic elements. **Figure S7.** Length  
215 distribution of small InDels in the whole genome (A) and coding sequence (CDS) regions (B).  
216 Additional file 2: Accession numbers of 1.10 Mb novel SNPs. (txt 20.3 Mb)

## 218 **Funding**

219 This work was supported by grants from the China Agricultural Research System (CARS-41),  
220 the 12<sup>th</sup> Five Year Plan for breeding program in Sichuan-Selective breeding of new breeds and  
221 the synthetic strains in laying hens (2011NZ0099-7), the National Natural Science Foundation  
222 of China (31402063 and 31522055), the Sichuan Provincial Department of Science &  
223 Technology Program (2015JQ0023), the National Program for Support of Top-notch Young  
224 Professionals and the Young Scholars of the Yangtze River.

## 225 **Authors' contributions**

226 Q.Z., and MZ.L. designed and supervised the project. B.C., M.L., H.Y., Y.W., X.Z., G.Z., U.G.,  
227 MJ.L., L.Z., M.Y., R.J., R.L., and X.Z collected and generated the data, and performed the  
228 preliminary bioinformatic analyses. T.C., S.T., Y.L., Z.X., L.J., Q.T., H.X., and X.Z. filtered

---

229 the data and performed the majority of the population genetic analysis. D.L. and T.C. wrote the  
230 manuscript.

231

232 **Competing financial interests**

233 The authors declare no competing financial interests.

234

235 **References**

236

237 1. Li H, Durbin R. Fast and accurate long-read alignment with Burrows–Wheeler transform.  
238 *Bioinformatics*. 2010; 26: 589-595.

239 2. Li H, Handsaker B, Wysoker A, Fennell T, Ruan J, Homer N, et al. The sequence  
240 alignment/map format and SAMtools. *Bioinformatics*. 2009; 25: 2078-2079.

241 3. McKenna A, Hanna M, Banks E, Sivachenko A, Cibulskis K, Kernytzky A, et al. The  
242 Genome Analysis Toolkit: a MapReduce framework for analyzing next-generation  
243 DNA sequencing data. *Genome Res*. 2010; 20: 1297-1303.

244 4. Conesa A, Götz S, García-Gómez JM, Terol J, Talón M, Robles M. Blast2GO: a  
245 universal tool for annotation, visualization and analysis in functional genomics  
246 research. *Bioinformatics*. 2005; 21: 3674-3676.

247 5. Felsenstein J. Confidence limits on phylogenies: an approach using the bootstrap.  
248 *Evolution*. 1985; 39: 783-791.

249 6. Price AL, Patterson C, Reich D, Derrigan R, Lindley S, Richards M, et al. Population structure and  
250 eigenanalysis. *Plos Genetics*. 2006; 2: 2074--2093.

251 7. Nei M, Li WH. Mathematical model for studying genetic variation in terms of  
252 restriction endonucleases. *Proc Natl Acad Sci U S A*. 1979; 76: 5269-5273.

253 8. Ming-Shan W, Yan L, Min-Sheng P, Li Z, Zong-Ji W, Qi-Ye L, et al. Genomic  
254 Analyses Reveal Potential Independent Adaptation to High Altitude in Tibetan  
255 Chickens. *Molecular Biology & Evolution*. 2015; 32: 1880-9.

256 9. Li D, Che T, Chen B, Tian S, Zhou X, Li M, Zhang G, Gaur U, Li Y, Luo M, Zhang L, Xu  
257 Z, Zhao X, Yin H, Wang Y, Jin L, Tang, Q, Xu H, Yang M, Zhou R, Li, R, Zhu Q, Li M  
258 (2017): Supporting data for "Genomic data for 78 chickens from 14 populations"  
259 *GigaScience* Database. <http://dx.doi.org/10.5524/100291>

260

261

262

263

264

265

266

267

268

269

270

271

272

273

274

275

Figure

[Click here to download Figure Figure 1.pdf](#)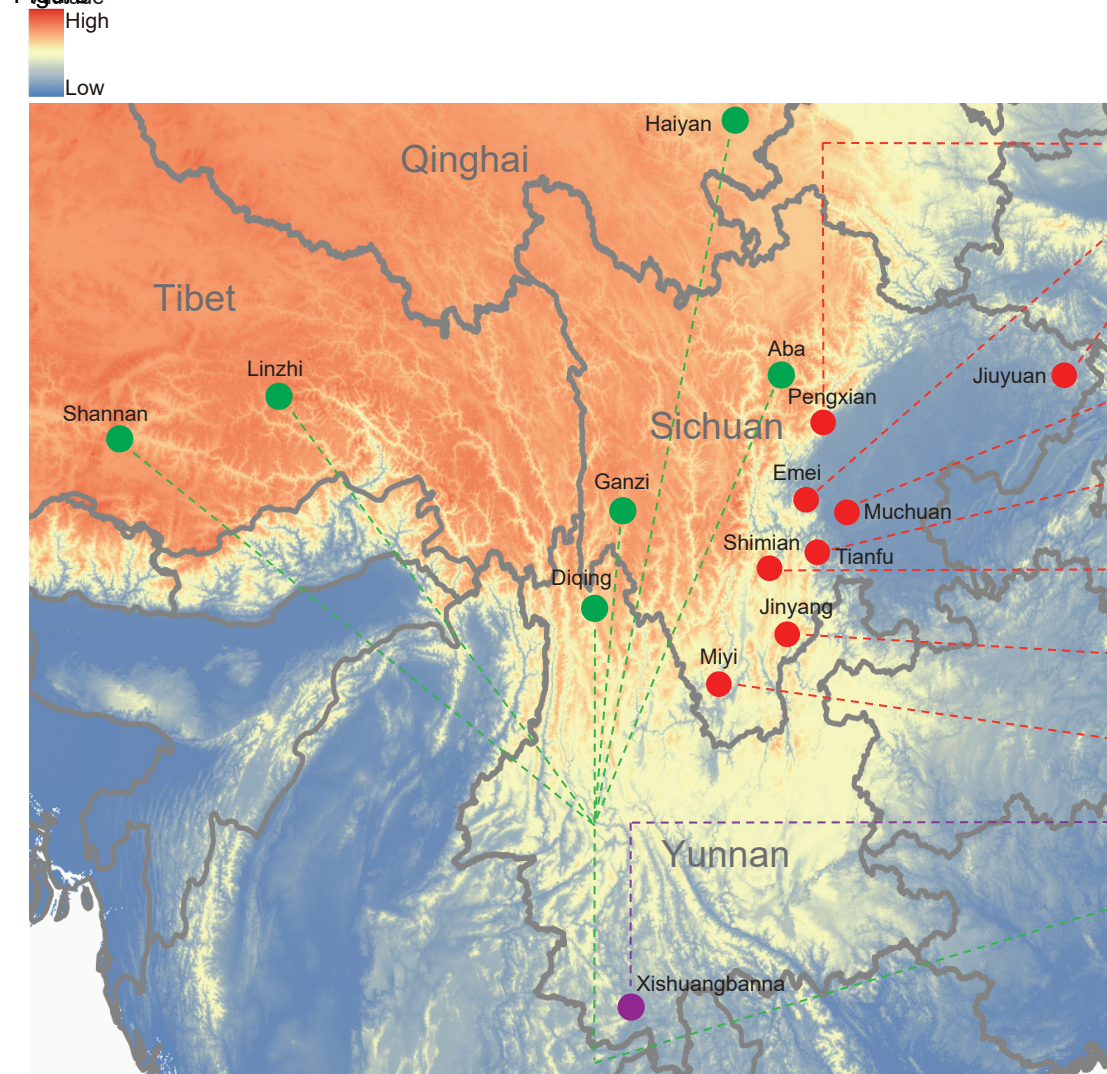

| ♂ | ♀ | Breed                                | Population (n)    | Group <sup>1</sup> | Known SNPs(Mb) | Novel SNPs(Mb) | Breed/Population specific SNPs |
|---|---|--------------------------------------|-------------------|--------------------|----------------|----------------|--------------------------------|
|   |   | Pengxian yellow fowl                 | Pengxian (6)      | Cluster3           | 5.79           | 0.46           | 1,398                          |
|   |   | Emei black fowl                      | Emei (6)          | Cluster3           | 6.03           | 0.57           | 2,511                          |
|   |   | Jiuyuan black-bone fowl              | Jiuyuan (5)       | Cluster3           | 5.99           | 0.52           | 1,665                          |
|   |   | Muchuan black-bone fowl              | Muchuan (5)       | Cluster3           | 6.14           | 0.55           | 1,654                          |
|   |   | Tianfu black-bone fowl               | Tianfu (5)        | Cluster3           | 6.18           | 0.56           | 1,651                          |
|   |   | Shimian caoke fowl                   | Shimian (4)       | Cluster3           | 5.25           | 0.38           | 1,908                          |
|   |   | Jinyang silky fowl                   | Jinyang (6)       | Cluster2           | 5.92           | 0.71           | 1,727                          |
|   |   | Miyi fowl                            | Miyi (5)          | Cluster2           | 4.75           | 0.52           | 2,123                          |
|   |   | Xishuangbanna game fowl <sup>2</sup> | Xishuangbanna (8) | Cluster1           | 6.42           | 0.69           | 4,716                          |
|   |   | Tibetan fowl                         | Aba (5)           | Cluster1,2,3       | 6.02           | 0.67           | 2,379                          |
|   |   | Tibetan fowl                         | Diqing (6)        | Cluster1,2,3       | 6.53           | 0.75           | 2,270                          |
|   |   | Tibetan fowl                         | Ganzi (6)         | Cluster2,3         | 6.17           | 0.76           | 2,169                          |
|   |   | Tibetan fowl                         | Linzhi (5)        | Cluster1,2,3       | 6.12           | 0.62           | 2,499                          |
|   |   | Tibetan fowl                         | Haiyan (6)        | Cluster1,2         | 6.30           | 0.75           | 2,561                          |
|   |   | Tibetan fowl                         | Shannan (8)       | Cluster1,3         | 6.72           | 0.79           | 2,687                          |
|   |   | Red jungle fowl <sup>2</sup>         | RJF_Yunnan (4)    | Cluster1           | 5.79           | 0.57           | 7,977                          |
|   |   | Red jungle fowl <sup>2</sup>         | RJF_Hainan (1)    | Cluster1           | 3.24           | 0.22           | 2,960                          |

Sichuan local chicken breeds

Tibetan chicken populations



Figure

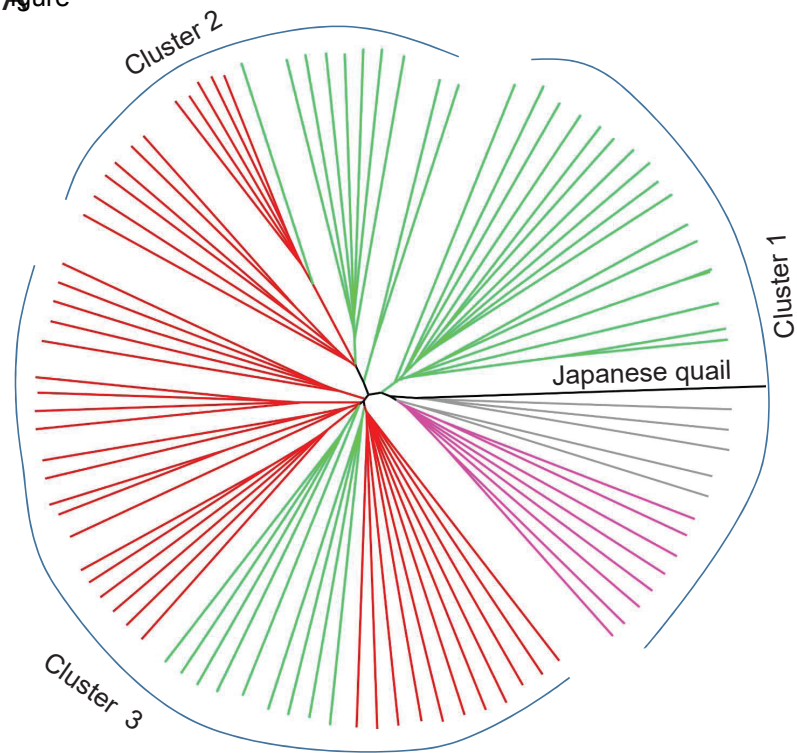

B

[Click here to download Figure Figure 2 .pdf](#)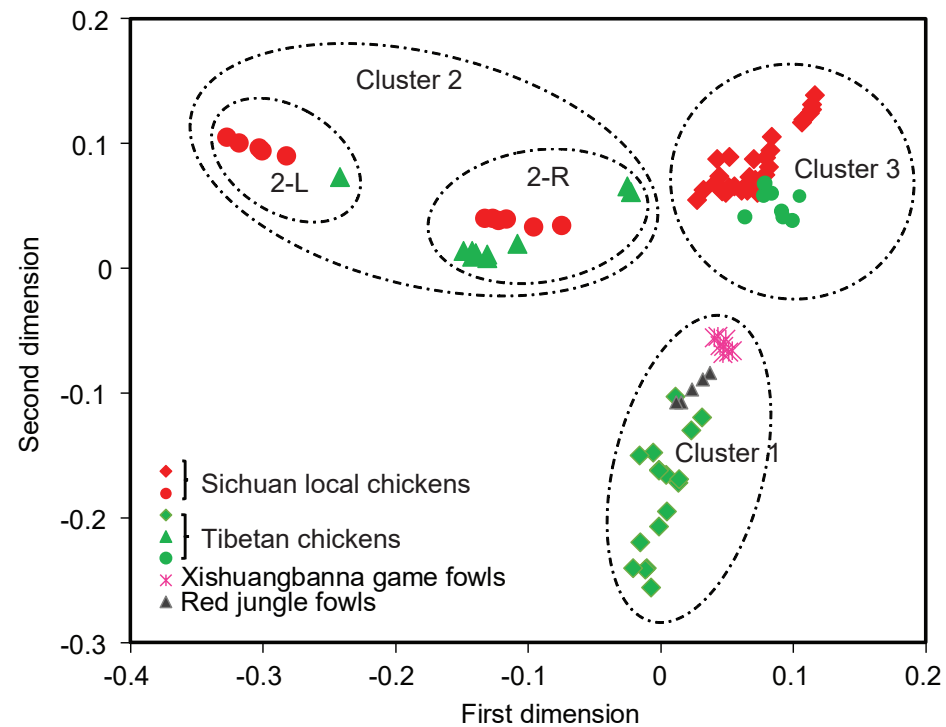



Click here to access/download  
**Supplementary Material**  
Additional file 2.txt



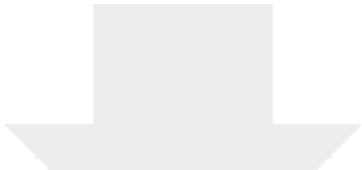

Click here to access/download  
**Supplementary Material**  
Additional file 1-R3.docx



Supplement: gix026_GIGA-D-16-00092_Revision_3.pdf [file gix026_GIGA-D-16-00092_Revision_3.pdf]
