# Supplementary material for: Genomic data for 78 chickens from 14 populations
Source: PubMed Central journal article supplement (PMC5449643; doi:10.1093/gigascience/gix026), 2017-04-18
Supplement: gix026_GIGA-D-16-00092_Revision_1.pdf [file gix026_GIGA-D-16-00092_Revision_1.pdf]

## Genomic data for 78 chickens from 14 populations

1 Diyan Li<sup>1†</sup>, Tiandong Che<sup>1†</sup>, Binlong Chen<sup>1†</sup>, Shilin Tian<sup>1,2†</sup>, Xuming Zhou<sup>3†</sup>, Guolong Zhang<sup>4†</sup>,  
2 Miao Li<sup>1</sup>, Uma Gaur<sup>1</sup>, Majing Luo<sup>5</sup>, Long Zhang<sup>1</sup>, Zhongxian Xu<sup>1</sup>, Xiaoling Zhao<sup>1</sup>, Huadong  
3 Yin<sup>1</sup>, Yan Wang<sup>1</sup>, Long Jin<sup>1</sup>, Qianzi Tang<sup>1</sup>, Huailiang Xu<sup>1</sup>, Mingyao Yang<sup>1</sup>, Rongjia Zhou<sup>5</sup>,  
4 Ruiqiang Li<sup>2</sup>, Qing Zhu<sup>1</sup> and Mingzhou Li<sup>1</sup>

5  
6  
7  
8 <sup>1</sup> Institute of Animal Genetics and Breeding, College of Animal Science and Technology,  
9 Sichuan Agricultural University, Chengdu, China

10 <sup>2</sup> Beijing Novogene bioinformatics Technology Co., Ltd, Beijing, China

11 <sup>3</sup> Division of Genetics, Department of Medicine, Brigham and Women's Hospital, Harvard  
12 Medical School, Boston, USA

13 <sup>4</sup> Department of Animal Science, Oklahoma State University, Stillwater, Oklahoma, USA

14 <sup>5</sup> Department of Genetics, College of Life Sciences, Wuhan University, Wuhan, China

15 <sup>†</sup> These authors contributed equally to this work.

16 **Correspondence:** [zhuqingsicau@163.com](mailto:zhuqingsicau@163.com); [mingzhou.li@sicau.edu.cn](mailto:mingzhou.li@sicau.edu.cn).

### Abstract

17 **Background:** Since the domestication of the red jungle fowls (*Gallus gallus*) (dating back to  
18 ~10,000 B.P.) in Asia, domestic chickens (*Gallus gallus domesticus*) have been subjected to the  
19 combined effects of natural selection and human-driven artificial selection; this has resulted in  
20 marked phenotypic diversity in a number of traits, including behavior, body composition, egg  
21 production and skin color. Population genomic variations through diversifying selection have  
22 not been fully reported.

23  
24 **Findings:** The whole genomes of 78 domestic chickens were sequenced to an average of 18-  
25 fold coverage for each bird. By combining this data with publicly available genomes of 5 wild  
26 red jungle fowls and 8 Xishuangbanna game fowls, we conducted a comprehensive  
27 comparative genomics analysis of 91 chickens from 17 populations. After aligning ~21.30  
28 gigabase (Gb) high quality data of each individual to the reference chicken genome, we  
29 identified ~6.44 million (M) SNPs for each population. These SNPs included 1.10 M novel  
30 SNPs in 17 populations that were absent in the current chicken dbSNP (Build 145) entries.

31 **Conclusions:** The current data is important for population genetics and further studies in  
32 chicken, and will serve as a valuable resource for investigating diversifying selection and  
33 candidate genes for selective breeding in chicken.

34 **Keywords:** Chicken, Genetic diversity, Population genomics, Whole-genome resequencing

### Data description

#### Genome sequencing and sequence filtering

35  
36  
37  
38 The 78 blood samples (36 Tibetan fowls from the Qinghai-Tibet Plateau and 42 domestic  
39 fowls from Szechwan Basin) (Table 1, Figure 1A and B) were collected from the wing vein.  
40 The animal handling experiments were approved by the Institutional Animal Care and Use  
41 Committee of Sichuan Agricultural University under permit number YCS-B20100804.  
42 Genomic DNA was extracted from these samples following standard procedures. In total, we  
43 generated ~1.69 trillion base resequencing data of the whole genomes from 78 birds (18.03-  
44 fold coverage for each individual) on the Illumina Hiseq 2500 platform. In addition, previously

1  
2  
3  
4  
5  
6  
7  
8  
9  
10  
11  
12  
13  
14  
15  
16  
17  
18  
19  
20  
21  
22  
23  
24  
25  
26  
27  
28  
29  
30  
31  
32  
33  
34  
35  
36  
37  
38  
39  
40  
41  
42  
43  
44  
45  
46  
47  
48  
49  
50  
51  
52  
53  
54  
55  
56  
57  
58  
59  
60  
61  
62  
63  
64  
65  
66  
67  
68  
69  
70  
71  
72  
73  
74  
75  
76  
77  
78  
79  
80  
81  
82

published genome sequence data from 5 red jungle fowls (RJF) and 8 Xishuangbanna game fowls (~16.6-fold coverage for each individual) were downloaded and analyzed (GenBank accession number PRJNA241474) (Table 1).

We also filtered out the adapter sequences ( $> 10$  nt aligned to the adapter, allowing  $\leq 10\%$  mismatches), low quality reads (i.e.  $\geq 10\%$  unidentified nucleotides or  $> 50\%$  bases having Phred quality  $< 5$ ) and duplicated reads generated in the library construction process.

## Data analysis

### *Reads mapping*

The high quality paired-end reads were mapped to the reference chicken genome (Galgal4.78) using Burrows-Wheeler Aligner (BWA) software (version 0.7.8) [1] with the command ‘mem -t 10 -k 32’ and BAM alignment files were generated using SAMtools (version 0.1.19) [2].

Next, we improved the alignment results by following steps:

(1) The aligned reads with mismatches  $\geq 5$  or mapping quality = 0 were removed;

(2) The alignment results were then corrected using Picard (version 1.96) (<http://broadinstitute.github.io/picard/>) with two core commands. The ‘AddOrReplaceReadGroups’ command was used to replace all read groups in the INPUT file with a new read group and assign all reads to this group in the OUTPUT BAM. The ‘FixMateInformation’ command was used to ensure that all mate-pair information was in sync between each read and its mate pair;

(3) Removed potential PCR duplications. If multiple read pairs had identical external coordinates, only the pair with the highest mapping quality was retained;

(4) Realigned reads around the InDels. We downloaded variants registered in chicken dbSNP database (Build 145) from NCBI, and generated a target list of intervals by using the command “RealignerTargetCreator” in package Genome Analysis Toolkit (GATK, version 3.1-1-g07a4bf8) [3]. We further used command “IndelRealigner” to identify regions for realignment where at least one read contains a registered InDel with a cluster of mismatching bases around it.

Consequently, ~21.30 Gb high quality data of each individual mapping to reference chicken genome (Additional file 1: Table S1) were used for subsequent analysis.

### *SNP calling*

We first detected individual SNPs simultaneously confirmed by both SAMtools and GATK. The highly accurate alignment was processed using the ‘mpileup’ program in SAMtools with the parameters ‘-C 50 -D -S -m 2 -F 0.002 -d 1000’ (‘-C 50’ is a recommended parameter, ‘-D’ and ‘-S’ are default parameters, ‘-m 2’, ‘-F 0.002’ and ‘-d 1000’ are required parameters). The variants were then filtered for downstream analysis by requiring a coverage ranging from 4 to

1 83 200, a minimum root-mean-square mapping quality of 20 and no gaps present within a 3-bp  
2 84 window. Meanwhile, we detected genomic variants for each bird using GATK with the  
3 85 HaplotypeCaller-based method; before calling variants, the base quality scores were  
4 86 recalibrated using command “BaseRecalibrator”, which provides empirically accurate base  
5 87 quality scores for each base in every read. After SNP calling, we applied hard filter command  
6 88 ‘VariantFiltration’ to exclude potential false-positive variant calls with the parameter ‘--  
7 89 filterExpression "QD < 10.0 || FS > 60.0 || MQ < 40.0 || ReadPosRankSum < -8.0" -G\_filter  
8 90 "GQ<20"’. As a result, ~5.26 Mb SNPs for each individual were identified (Additional file 1:  
9 91 Table S2).

10 92 Then we merged all individual SNPs into a population SNP-matrix. Finally, we obtained  
11 93 8.53 Mb highly credible SNPs after using strict criteria with filtering MAF (minor allele  
12 94 frequency) < 0.05 and missing genotype > 10% in chicken population. Subsequently, the  
13 95 package ANNOVAR (version May 20, 2013) [4] was used to annotate SNPs causing nonsense  
14 96 and missense mutations.

### 15 97

### 16 98 *Insertions and deletions (InDels) calling*

17 99 The candidate Indels were called along with SNPs by GATK for 91 individuals. We first  
18 100 sifted structural variations for each sample by GATK with the SelectVariants based method.  
19 101 Then, we applied hard filter command ‘VariantFiltration’ to exclude potential false-positive  
20 102 variant calls with the parameter ‘--filterExpression "QD < 2.0 || FS > 200.0 || ReadPosRankSum  
21 103 < -8.0 || InbreedingCoeff < -0.8"’. Finally, we only retained the 1-5 bp InDels for downstream  
22 104 analysis. As a result, 323.89-891.64 (K) InDels were identified for each individual, and  
23 105 ANNOVAR was also used to annotate these InDels.

### 24 106

### 25 107 *Analysis of the population structure and evolutionary history*

26 108 Rooted neighbor-joining phylogenetic tree was constructed under the p-distances model in  
27 109 TreeBeST (version 1.9.2) (<http://treesoft.sourceforge.net/treebest.shtml>), using Japanese quail  
28 110 as an outgroup. The reliability of each branch was evaluated by bootstrapping [5] with 1,000  
29 111 replicates. The phylogenetic relationships of the individual genomes were also estimated using  
30 112 principle component analysis (PCA) with the population-scale SNPs using the EIGENSOFT  
31 113 (version 5.0) [6] software, and the eigenvectors were obtained from the covariance matrix  
32 114 generated by R function reigen.

### 33 115

### 34 116 **Findings**

### 35 117 *Genetic diversity*

36 118 We conducted a comparative genomics analysis of 91 chickens from 15 domestic and 2  
37 119 wild populations (Table 1). The general phenotypic differences between red jungle fowls (RJF),  
38 120 Tibetan fowls and Sichuan local fowls were presented in Additional file 1: Table S3. We  
39 121 identified 3.46-7.52 M SNPs for each population that were confirmed by both SAMtools and

GATK softwares, including 1.10 M novel SNPs in 17 populations that were absent from the current chicken dbSNP database (Figure 1C). Among them, there was 1,812,591 (21.24%) SNPs could be detected in all populations. Allele frequency spectrum for the identified SNPs in each individual was presented in Additional file 1: Table S4. There were 1,398 to 7,977 SNPs specifically detected in a breed/population (Table 1), and a small number of SNPs (ranging from 7 to 79) with a high frequency (>90%) in each breed or population was detected (Additional file 1: Table S5). An average of 601,024 small InDels (1-5bp, ~ 294,493 insertions and 306,551 deletions) for each individual were also identified (Additional file 1: Table S6).

Nucleotide variability ( $\theta_\pi$ ) and polymorphism ( $\theta_\omega$ ) in each population were analyzed using the method of sequence diversity statistics [7]. Compared with Sichuan domestic breeds ( $\theta_\pi = 2.35 \times 10^{-3}$  and  $\theta_\omega = 2.13 \times 10^{-3}$ ), Tibetan chicken populations have relatively higher genetic diversity ( $\theta_\pi = 2.58 \times 10^{-3}$ ,  $P < 2.2 \times 10^{-16}$  and  $\theta_\omega = 2.35 \times 10^{-3}$ ,  $P = 0.656$ , Mann-Whitney  $U$  test) (Additional file 1: Table S2).

**Table 1 Sample information.**

| Type                         | Population (n)    | Breed                   | Group <sup>1</sup> | Location, average altitude (m) | Breed/Population specific SNPs |
|------------------------------|-------------------|-------------------------|--------------------|--------------------------------|--------------------------------|
| Sichuan local chicken breeds | Pengxian (6)      | Pengxian yellow fowl    | SW1                | Pengxian, Sichuan, 800 m       | 1,398                          |
|                              | Emei (6)          | Emei black fowl         | SW1                | Leshan, Sichuan, 400 m         | 2,511                          |
|                              | Jiuyuan (5)       | Jiuyuan black fowl      | SW1                | Yaan, Sichuan, 900 m           | 1,665                          |
|                              | Muchuan (5)       | Muchuan silky fowl      | SW1                | Muchuan, Sichuan, 500 m        | 1,654                          |
|                              | Shimian (4)       | Shimian caoke fowl      | SW1                | Shimian, Sichuan, 790 m        | 1,908                          |
|                              | Tianfu (5)        | Tianfu silky fowl       | SW1                | Chengdu, Sichuan, 540 m        | 1,651                          |
|                              | Miyi (5)          | Miyi fowl               | SW2                | Panzhihua, Sichuan, 1,400 m    | 2,123                          |
|                              | Jinyang (6)       | Jinyang silky fowl      | SW2                | Jinyang, Sichuan, 460 m        | 1,727                          |
| Tibetan chicken populations  | Aba (5)           | Tibetan fowl            | TC1 TC2 TC3        | Aba, Sichuan, 3,300 m          | 2,379                          |
|                              | Diqing (6)        | Tibetan fowl            | TC1 TC2 TC3        | Diqing, Yunnan, 3,280 m        | 2,270                          |
|                              | Ganzi (6)         | Tibetan fowl            | TC2 TC3            | Ganzi, Sichuan, 3,390 m        | 2,169                          |
|                              | Linzi (5)         | Tibetan fowl            | TC1 TC2 TC3        | Linzi, Tibet, 3,100 m          | 2,499                          |
|                              | Haiyan (6)        | Tibetan fowl            | TC1 TC2            | Haiyan, Qinghai, 3,260 m       | 2,561                          |
|                              | Shannan (8)       | Tibetan fowl            | TC1 TC3            | Shannan, Tibet, 3,700 m        | 2,687                          |
| Game fowl <sup>2</sup>       | Xishuangbanna (8) | Xishuangbanna game fowl | SW3                | Xishuangbanna, Yunnan, 1,500 m | 4,716                          |
| RJF <sup>2</sup>             | RJF_Yunnan (4)    | Red jungle fowl         | RJF                | Yunnan                         | 7,977                          |
|                              | RJF_Hainan (1)    | Red jungle fowl         | RJF                | Hainan                         | 2,960                          |

<sup>1</sup> Individual distribution to each group can be found in Additional file 1: Table S1.

<sup>2</sup> The whole-genome sequencing data of eight game fowls and 5 RJFs were downloaded from the NCBI (PRJNA241474).

### Population genetics

The neighbor-joining phylogenetic tree revealed the segregation of 15 domestic populations and 2 wild RJF populations into seven distinct clusters (SW1, SW2, SW3, TC1, TC2, TC3 and a RJF group) (Figure 1D,E). A similar pattern of clustering was also observed based on principal component analysis (PCA) using EIGENSOFT package [6]. Different from a previous report on the two independent origins of Tibetan chickens [8], we revealed the presence of at least three distinct clusters among the six geographically representative

147 populations of Tibetan fowls: the fowls inhabiting Tibet and Qinghai (cluster TC1) were  
 148 genetically closer to RJF, while the TCs inhabiting Yunnan and Sichuan (cluster TC2 and TC3)  
 149 were closer to the domestic populations (Figure 1D). These distinct distribution patterns and  
 150 expansion signatures suggested that the divergent Tibetan clades may have originated from  
 151 different regions, such as Yunnan, southwest China and/or surrounding areas [8]. We found that  
 152 TC2 and TC3 clustered with other Sichuan local chicken breeds, which may be attributable to  
 153 shared ancestral polymorphism and/or recent introgression events by way of possible  
 154 crossbreeding between TC with the geographically neighboring Sichuan local chickens.  
 155 Although this inference is consistent with recent breeding activities in Tibet plateau [8], further  
 156 analysis are required to explore the introgression between them.

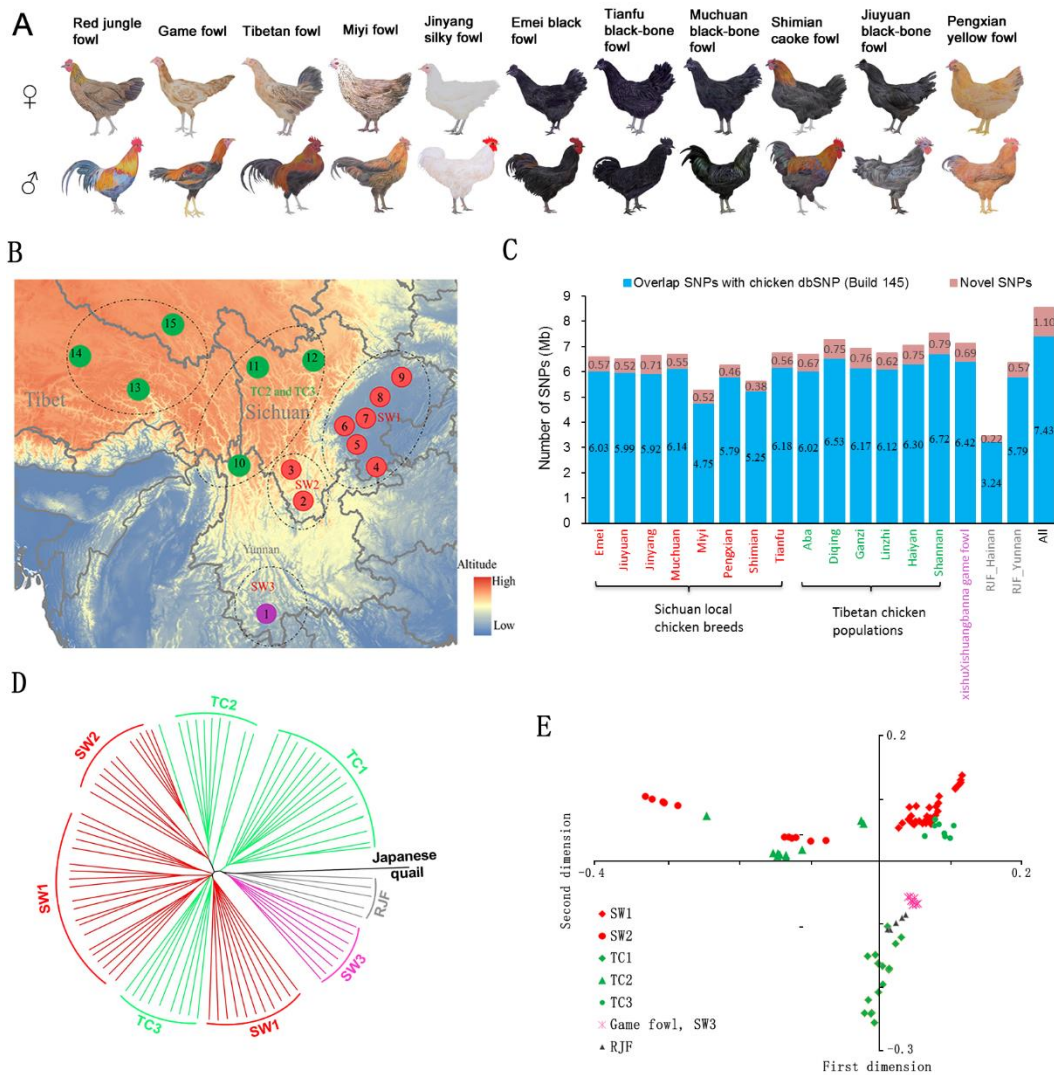

157  
 158 **Figure 1 Population genetics of studied chickens.**

159 (A) The striking phenotypic differences among the RJF and 10 domestic chicken breeds analyzed in this study. (B) Geographic  
 160 distribution of the chicken populations. Red and green localities represent eight lowland and six highland chicken populations  
 161 sampled in this study, respectively. 1-15 represent Xishuangbanna, Miyi, Jinyang, Muchuan, Emei, Shimian, Jiuyuan, Tianfu,  
 162 Pengxian, Diqing, Ganzi, Aba, Shannan, Linzhi and Haiyan, respectively. (C) Comparison of identified SNPs in the 15 domestic  
 163 chicken populations and red jungle fowls with the public database of chicken variants (dbSNP, Build 145). (D) Rooted neighbor-  
 164 joining phylogenetic tree with the neighbor-joining method, using Japanese quail as an outgroup. The reliability of each branch

165 was evaluated by bootstrapping with 1,000 replicates. Different groups of chicken populations: Sichuan domestic chickens (red),  
166 Tibetan chickens (green), the Xishuangbanna game fowls (purple), RJFs (grey) and Japanese quail (black). (E) Principal component  
167 plots. The first dimension and second dimension are shown. The fraction of the variance explained was 8.91% for eigenvector 1  
168 ( $P < 0.05$ , Tracy-Widom test) and 7.43% for eigenvector 2 ( $P < 0.05$ , Tracy-Widom test).

## 169 **Conclusion**

170  
171 Understanding the nature of diversifying selection, especially detecting selection  
172 signatures, and identifying genes in a genome that are, or have been, under selection have been  
173 the hot topics of interests. This study provides comparative genomic landscape of variations in  
174 17 chicken populations to understand genetic variations underlying the phenotypic diversity of  
175 chicken breeds/populations. This data will serve as a valuable resource for investigating diversifying  
176 selection and candidate genes for selective breeding in chicken.

## 177 178 179 **Availability of supporting data**

180 The sequencing data for this project have been deposited in the NCBI sequence read archive  
181 (SRA) under accession number SRP067615. All supplementary figures and tables are provided  
182 in Additional file 1.

## 183 184 **Additional file**

185 Additional file 1: Table S1, Table S2, Table S3, Table S4, Table S5 and Table S6. (xlsx 741KB).  
186 **Table S1.** A summary of the chickens used in this study: regions of collection/popularization  
187 and coverage and mean depth of resequencing. **Table S2.** SNPs annotation and genetic diversity  
188 of 17 chicken populations analyzed in this study. **Table S3.** The general phenotypic differences  
189 between RJF, Tibetan and Sichuan local chickens. **Table S4.** Allele frequency spectrum for the  
190 identified SNPs in each individual. **Table S5.** The frequency distribution of breed/population  
191 specific SNPs. **Table S6.** The small indels (1-5bp) in 91 individuals.

## 192 193 194 **Funding**

195 This work was supported by China Agricultural Research System (CARS-41), the 12th Five  
196 Year Plan for breeding program in Sichuan-Selective breeding of new breeds and the synthetic  
197 strains in laying hens (2011NZ0099-7), National Natural Science Foundation of China  
198 (31402063), Sichuan Provincial Department of Science and Technology Program  
199 (2015JQ0023) and the National Program for Support of Top-notch Young Professionals and  
200 the Young Scholars of the Yangtze River.

## 201 **Authors' contributions**

202 Q.Z., and MZ.L. designed and supervised the project. B.C., M.L., H.Y., Y.W., X.Z., G.Z., U.G.,  
203 MJ.L., L.Z., M.Y., R.J., R.L., and X.Z collected and generated the data, and performed the  
204 preliminary bioinformatic analyses. T.C., S.T., Z.X., L.J., Q.T., H.X., and X.Z. filtered the data  
205 and performed the majority of the population genetic analysis. D.L. and T.C. wrote the

206 manuscript.

207

208 **Competing financial interests**

209 The authors declare no competing financial interests.

210

211 **References**

212

- 213 1. Li H, Durbin R. Fast and accurate long-read alignment with Burrows–Wheeler transform. *Bioinformatics*. 2010; 26: 589-595.
- 214 215 2. Li H, Handsaker B, Wysoker A, Fennell T, Ruan J, Homer N, et al. The sequence alignment/map format and SAMtools. *Bioinformatics*. 2009; 25: 2078-2079.
- 216 217 3. McKenna A, Hanna M, Banks E, Sivachenko A, Cibulskis K, Kernytsky A, et al. The Genome Analysis Toolkit: a MapReduce framework for analyzing next-generation DNA sequencing data. *Genome Res*. 2010; 20: 1297-1303.
- 218 219 4. Conesa A, Götz S, García-Gómez JM, Terol J, Talón M, Robles M. Blast2GO: a universal tool for annotation, visualization and analysis in functional genomics research. *Bioinformatics*. 2005; 21: 3674-3676.
- 220 221 222 5. Felsenstein J. Confidence limits on phylogenies: an approach using the bootstrap. *Evolution*. 1985; 39: 783-791.
- 223 224 6. Price AL, Patterson C, Plenge RM, Weinblatt M, Shadick NA, Reich D. Population structure and eigenanalysis. *Plos Genetics*. 2006; 2: 2074-2093.
- 225 226 227 7. Nei M, Li WH. Mathematical model for studying genetic variation in terms of restriction endonucleases. *Proc Natl Acad Sci U S A*. 1979; 76: 5269-5273.
- 228 229 230 8. Ming-Shan W, Yan L, Min-Sheng P, Li Z, Zong-Ji W, Qi-Ye L, et al. Genomic Analyses Reveal Potential Independent Adaptation to High Altitude in Tibetan Chickens. *Molecular Biology & Evolution*. 2015; 32: 1880-9.
- 231 232 233

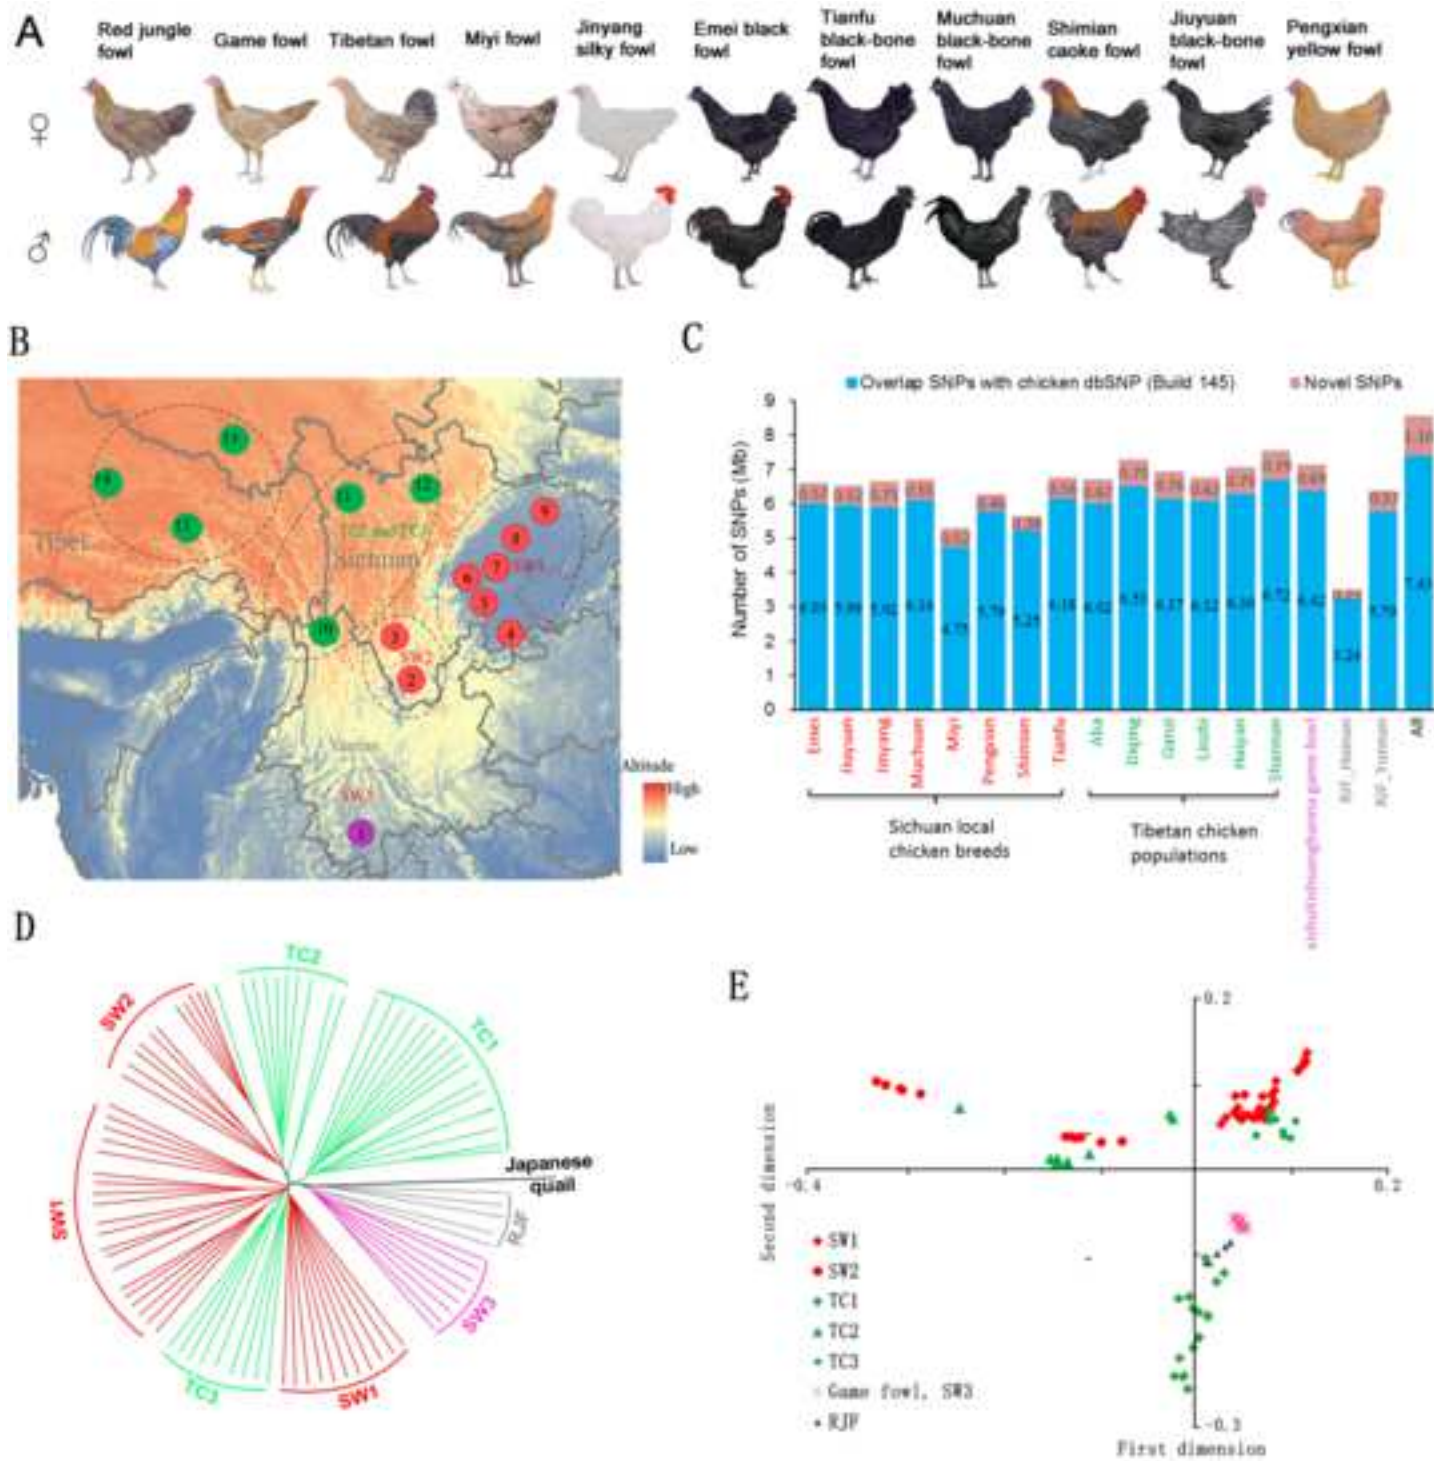



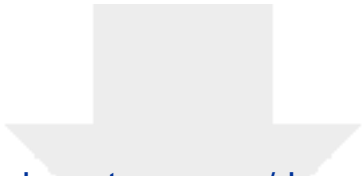

Click here to access/download  
**Supplementary Material**  
Additional file 1.xlsx



## *Sichuan Agricultural University*

Institute of Animal Genetics and Breeding Sciences

Chengdu 611130, P. R. China

Tel: (0086) 028-86290991, E-mail: zhuqingsicau@163.com

---

Editor  
*GigaScience*

October 25, 2016

Dear Editor-in-Chief,

I am pleased to submit our manuscript entitled “**Genomic data for 78 chickens from 14 populations**” for your consideration for publication in *GigaScience*.

Population genomic variations through diversifying selection have not been reported, although chicken genome has been sequenced. In this study, we resequenced the whole genomes from a 78 domestic chickens including 42 lowland chickens from 8 phenotypically diverse breeds and 36 Tibetan chickens from 6 major highland locations in Qinghai-Tibet Plateau, and present provide a population-level genome landscape of genetic variations in chickens. This data can be further used to provide new insights into diversifying selection and candidate genes for selective breeding. I am sure this is good topic for your journal. I am pleased to submit it for your consideration for publication in your journal.

The manuscript has not been submitted or is under consideration for publication elsewhere now. All authors agree to submit to your journal.

I look forward to hearing from you. Thank you for your consideration!

With best regards,

Qingzhu.
